# Supplementary material
Source: Springer Nature journal article supplement (https://www.springermedizin.de/resource/supplementary/12874_2006_192_MOESM5_ESM.pdf/9434062)

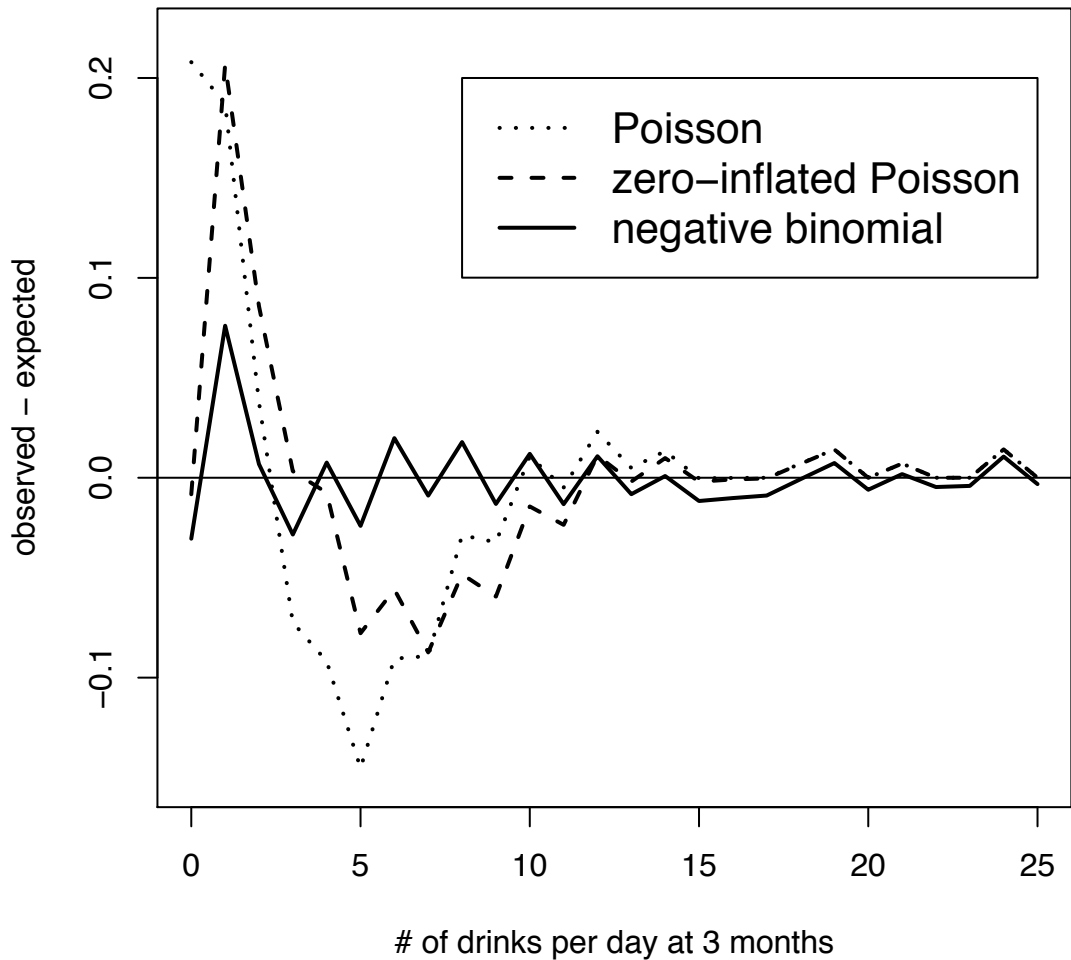

Supplement: MOESM5 [file 9434062]
